# Supplementary material for: Curved adhesions mediate cell attachment to soft matrix fibres in three dimensions
Source: PubMed Central journal article supplement (PMC10567576; doi:10.1038/s41556-023-01238-1), 2023-09-28
Supplement: 41556_2023_1238_MOESM2_ESM.pdf [file 41556_2023_1238_MOESM2_ESM.pdf]

## Peer Review Information

---

**Journal:** Nature Cell Biology

**Manuscript Title:** Curved adhesions mediate cell attachment to soft matrix fibres in 3D

**Corresponding author name(s):** Professor Bianxiao Cui

### Editorial Notes:

**Transferred manuscripts** This manuscript has been previously reviewed at another journal that is not operating a transparent peer review scheme. This document only contains reviewer comments, rebuttal and decision letters for versions considered at Nature Cell Biology.

### Reviewer Comments & Decisions:

|                                          |
|------------------------------------------|
| <b>Decision Letter, initial version:</b> |
|------------------------------------------|

Our ref: NCB-A50756-T

6th June 2023

Dear Dr. Cui,

I am sorry once again for the delay, as Reviewer #2 was unable to re-review your revisions. We secured reviewer #1 to assess on your responses to Reviewer #2's previous concerns.

Thank you for submitting your revised manuscript "Curved adhesions mediate cell attachment to soft matrix fibres in 3D" (NCB-A50756-T). It has now been seen by the original referee(s) and their comments are below. The reviewers find that the paper has improved in revision, and therefore we'll be happy in principle to publish it in Nature Cell Biology, pending minor revisions to satisfy the referees' final requests and to comply with our editorial and formatting guidelines.

The current version of your manuscript is in a PDF format, so please email us a copy of the file in an editable format (Microsoft Word or LaTeX)-- we can not proceed with PDFs at this stage.

We are now performing detailed checks on your paper and will send you a checklist detailing our editorial and formatting requirements in about a week. Please do not upload the final materials and make any revisions until you receive this additional information from us.

Please note that starting today through June 24th, I will be out of the office. I have cc'ed my brilliant colleague Dr. Sabrya Carim (sabrya.carim@springernature.com) who will gladly answer any questions you may have and help you in the next steps during my absence.

Thank you again for your interest in Nature Cell Biology Please do not hesitate to contact us if you have any questions.

Sincerely,  
Daryl

-----

Daryl Jason Verzosa David, PhD

Senior Editor, Nature Cell Biology  
Nature Portfolio

Heidelberger Platz 3, 14197 Berlin, Germany  
Email: daryl.david@nature.com  
ORCID: <https://orcid.org/0000-0002-9253-4805>

Reviewer #1 (Remarks to the Author):

I went carefully through the questions that reviewer 2 had. I think the response of the authors is completely thorough and they meticulously addressed every aspect. The authors have a really strong case and I think NCB is the right journal for this work. I am convinced that this will be a highly cited paper. It is also very timely as the field of curvature sensing is more and more moving from endocytosis towards substrate interaction. Exciting work!

**Decision Letter, final checks:**

Our ref: NCB-A50756-T

19th June 2023

Dear Dr. Cui,

Thank you for your patience as we've prepared the guidelines for final submission of your Nature Cell Biology manuscript, "Curved adhesions mediate cell attachment to soft matrix fibres in 3D" (NCB-A50756-T). Please carefully follow the step-by-step instructions provided in the attached file, and add a response in each row of the table to indicate the changes that you have made. Please also check and comment on any additional marked-up edits we have proposed within the text. Ensuring that each point is addressed will help to ensure that your revised manuscript can be swiftly handed over to our production team.

We would like to start working on your revised paper, with all of the requested files and forms, as

soon as possible (preferably within two weeks). Please get in contact with us if you anticipate delays.

When you upload your final materials, please include a point-by-point response to any remaining reviewer comments.

If you have not done so already, please alert us to any related manuscripts from your group that are under consideration or in press at other journals, or are being written up for submission to other journals (see: <https://www.nature.com/nature-research/editorial-policies/plagiarism#policy-on-duplicate-publication> for details).

In recognition of the time and expertise our reviewers provide to Nature Cell Biology's editorial process, we would like to formally acknowledge their contribution to the external peer review of your manuscript entitled "Curved adhesions mediate cell attachment to soft matrix fibres in 3D". For those reviewers who give their assent, we will be publishing their names alongside the published article.

Nature Cell Biology offers a Transparent Peer Review option for new original research manuscripts submitted after December 1st, 2019. As part of this initiative, we encourage our authors to support increased transparency into the peer review process by agreeing to have the reviewer comments, author rebuttal letters, and editorial decision letters published as a Supplementary item. When you submit your final files please clearly state in your cover letter whether or not you would like to participate in this initiative. Please note that failure to state your preference will result in delays in accepting your manuscript for publication.

### **Cover suggestions**

As you prepare your final files we encourage you to consider whether you have any images or illustrations that may be appropriate for use on the cover of Nature Cell Biology.

Covers should be both aesthetically appealing and scientifically relevant, and should be supplied at the best quality available. Due to the prominence of these images, we do not generally select images featuring faces, children, text, graphs, schematic drawings, or collages on our covers.

We accept TIFF, JPEG, PNG or PSD file formats (a layered PSD file would be ideal), and the image should be at least 300ppi resolution (preferably 600-1200 ppi), in CMYK colour mode.

If your image is selected, we may also use it on the journal website as a banner image, and may need to make artistic alterations to fit our journal style.

Please submit your suggestions, clearly labeled, along with your final files. We'll be in touch if more information is needed.

Nature Cell Biology has now transitioned to a unified Rights Collection system which will allow our Author Services team to quickly and easily collect the rights and permissions required to publish your work. Approximately 10 days after your paper is formally accepted, you will receive an email in providing you with a link to complete the grant of rights. If your paper is eligible for Open Access, our Author Services team will also be in touch regarding any additional information that may be required to arrange payment for your article.

Please note that *Nature Cell Biology* is a Transformative Journal (TJ). Authors may publish their research with us through the traditional subscription access route or make their paper immediately open access through payment of an article-processing charge (APC). Authors will not be required to make a final decision about access to their article until it has been accepted. [Find out more about Transformative Journals](#)

**Authors may need to take specific actions to achieve [compliance](#) with funder and institutional open access mandates.** If your research is supported by a funder that requires immediate open access (e.g. according to [Plan S principles](#)) then you should select the gold OA route, and we will direct you to the compliant route where possible. For authors selecting the subscription publication route, the journal's standard licensing terms will need to be accepted, including [self-archiving policies](#). Those licensing terms will supersede any other terms that the author or any third party may assert apply to any version of the manuscript.

Please note that you will not receive your proofs until the publishing agreement has been received through our system.

For information regarding our different publishing models please see our [Transformative Journals](#) page. If you have any questions about costs, Open Access requirements, or our legal forms, please contact [ASJournals@springernature.com](mailto:ASJournals@springernature.com).

Please use the following link for uploading these materials:  
[Redacted]

If you have any further questions, please feel free to contact me.

Best regards,

Kendra Donahue  
Staff  
Nature Cell Biology

On behalf of

-----

Daryl Jason Verzosa David, PhD

Senior Editor, Nature Cell Biology  
Nature Portfolio

Heidelberger Platz 3, 14197 Berlin, Germany  
Email: [daryl.david@nature.com](mailto:daryl.david@nature.com)

ORCID: <https://orcid.org/0000-0002-9253-4805>

Reviewer #1:

Remarks to the Author:

I went carefully through the questions that reviewer 2 had. I think the response of the authors is completely through and they meticulously addressed every aspect. The authors have a really strong case and I think NCB is the right journal for this work. I am convinced that this will be a highly cited paper. It is also very timely as the field of curvature sensing is more and more moving from endocytosis towards substrate interaction. Exciting work!

**Author Rebuttal, initial submissions:**

Response to remaining reviewer comments

Reviewer #1:

Remarks to the Author:

I went carefully through the questions that reviewer 2 had. I think the response of the authors is completely through and they meticulously addressed every aspect. The authors have a really strong case and I think NCB is the right journal for this work. I am convinced that this will be a highly cited paper. It is also very timely as the field of curvature sensing is more and more moving from endocytosis towards substrate interaction. Exciting work!

Response:

We appreciate the reviewer's positive feedback. We are glad to hear that the reviewer found our response to the questions raised by Reviewer 2 to be comprehensive and meticulous. It is encouraging to note Reviewer #1's recognition of the timeliness of our research in the field of curvature sensing. Once again, we would like to express our gratitude for the reviewer's detailed and constructive comments in the previous rounds of review, which have helped us improve the quality of this study.

**Final Decision Letter:**

Dear Dr Cui,

I am pleased to inform you that your manuscript, "Curved adhesions mediate cell attachment to soft matrix fibres in 3D", has now been accepted for publication in Nature Cell Biology.

Thank you for sending us the final manuscript files to be processed for print and online production, and for returning the manuscript checklists and other forms. Your manuscript will now be passed to our production team who will be in contact with you if there are any questions with the production quality of supplied figures and text.

Over the next few weeks, your paper will be copyedited to ensure that it conforms to Nature Cell Biology style. Once your paper is typeset, you will receive an email with a link to choose the appropriate publishing options for your paper and our Author Services team will be in touch regarding any additional information that may be required.

After the grant of rights is completed, you will receive a link to your electronic proof via email with a request to make any corrections within 48 hours. If, when you receive your proof, you cannot meet this deadline, please inform us at [rjsproduction@springernature.com](mailto:rjsproduction@springernature.com) immediately.

You will not receive your proofs until the publishing agreement has been received through our system.

Due to the importance of these deadlines, we ask that you please let us know now whether you will be difficult to contact over the next month. If this is the case, we ask you provide us with the contact information (email, phone and fax) of someone who will be able to check the proofs on your behalf, and who will be available to address any last-minute problems.

If you have any questions about our publishing options, costs, Open Access requirements, or our legal forms, please contact [ASJournals@springernature.com](mailto:ASJournals@springernature.com)

Once your paper has been scheduled for online publication, the Nature press office will be in touch to confirm the details. An online order form for reprints of your paper is available at <https://www.nature.com/reprints/author-reprints.html>. All co-authors, authors' institutions and authors' funding agencies can order reprints using the form appropriate to their geographical region.

Publication is conditional on the manuscript not being published elsewhere and on there being no announcement of this work to any media outlet until the online publication date in Nature Cell Biology.

Please note that *Nature Cell Biology* is a Transformative Journal (TJ). Authors may publish their research with us through the traditional subscription access route or make their paper immediately open access through payment of an article-processing charge (APC). Authors will not be required to make a final decision about access to their article until it has been accepted. [Find out more about Transformative Journals](#)

**Authors may need to take specific actions to achieve [compliance](#) with funder and institutional open access mandates.** If your research is supported by a funder that requires immediate open access (e.g. according to [Plan S principles](#)) then you should select the gold OA route, and we will direct you to the compliant route where possible. For authors selecting the subscription publication route, the journal's standard licensing terms will need to be accepted, including [self-archiving policies](#). Those licensing terms will supersede any other terms that the author or any third party may assert apply to any version of the manuscript.

To assist our authors in disseminating their research to the broader community, our SharedIt initiative provides you with a unique shareable link that will allow anyone (with or without a subscription) to read the published article. Recipients of the link with a subscription will also be able to download and print the PDF.

If your paper includes color figures, please be aware that in order to help cover some of the additional cost of four-color reproduction, Nature Portfolio charges our authors a fee for the printing of their color figures. Please contact our offices for exact pricing and details.

As soon as your article is published, you will receive an automated email with your shareable link.

If you have not already done so, we strongly recommend that you upload the step-by-step protocols used in this manuscript to the Protocol Exchange ([www.nature.com/protocolexchange](http://www.nature.com/protocolexchange)), an open online resource established by Nature Protocols that allows researchers to share their detailed experimental know-how. All uploaded protocols are made freely available, assigned DOIs for ease of citation and are fully searchable through nature.com. Protocols and Nature Portfolio journal papers in which they are used can be linked to one another, and this link is clearly and prominently visible in the online versions of both papers. Authors who performed the specific experiments can act as primary authors for the Protocol as they will be best placed to share the methodology details, but the Corresponding Author of the present research paper should be included as one of the authors. By uploading your Protocols to Protocol Exchange, you are enabling researchers to more readily reproduce or adapt the methodology you use, as well as increasing the visibility of your protocols and papers. You can also establish a dedicated page to collect your lab Protocols. Further information can be found at [www.nature.com/protocolexchange/about](http://www.nature.com/protocolexchange/about)

You can use a single sign-on for all your accounts, view the status of all your manuscript submissions and reviews, access usage statistics for your published articles and download a record of your refereeing activity for the Nature Portfolio.

Please feel free to contact us if you have any questions.

With kind regards,  
Daryl

-----

Daryl Jason Verzosa David, PhD

Senior Editor, Nature Cell Biology  
Nature Portfolio

Heidelberger Platz 3, 14197 Berlin, Germany  
Email: [daryl.david@nature.com](mailto:daryl.david@nature.com)  
ORCID: <https://orcid.org/0000-0002-9253-4805>
