# Supplementary material for: Curved adhesions mediate cell attachment to soft matrix fibres in three dimensions
Source: PubMed Central journal article supplement (PMC10567576; doi:10.1038/s41556-023-01238-1), 2023-09-28

**Fig. 4n**

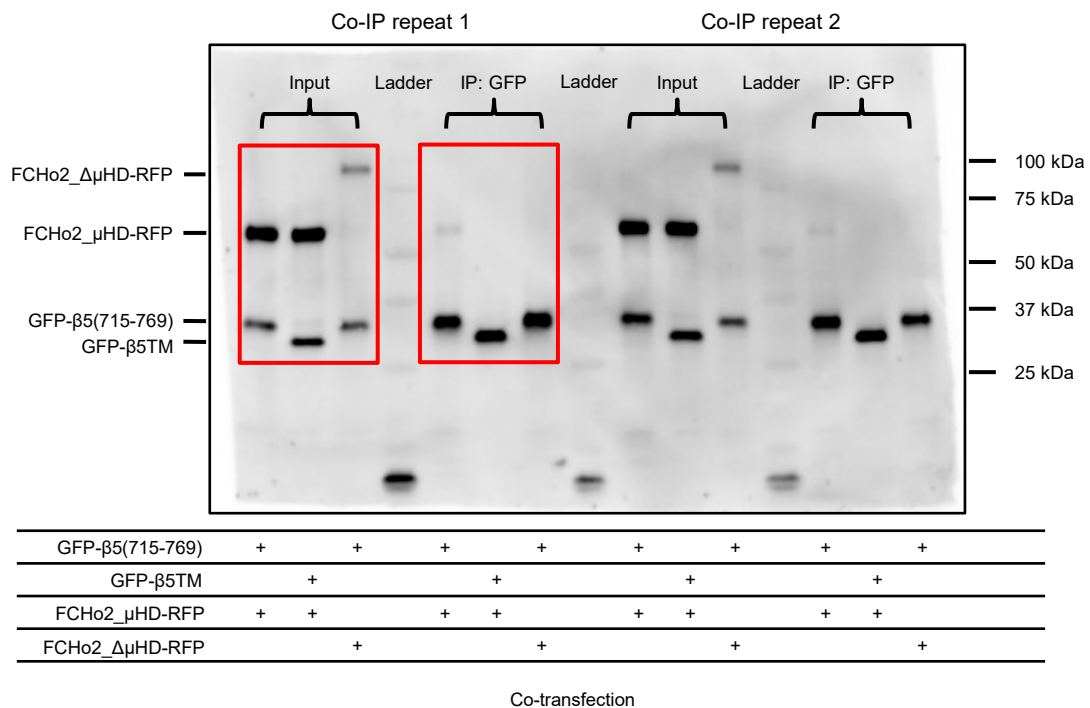

Supplement: 41556_2023_1238_MOESM14_ESM.pdf [file 41556_2023_1238_MOESM14_ESM.pdf]
